# Supplementary material for: Maturation of infant sleep during the first 6 months of life: a mini-scoping review
Source: Frontiers journal article supplement (doi:10.3389/fnins.2025.1581325), 2025-04-30

1 Supplemental Figure 1: Flow diagram for scoping review process. Initial PubMed search resulted  
 2 in 1,703 results and after applying filters, inclusion/exclusion criteria, and additional  
 3 bibliography searches, the total eligible sample was 35 studies.

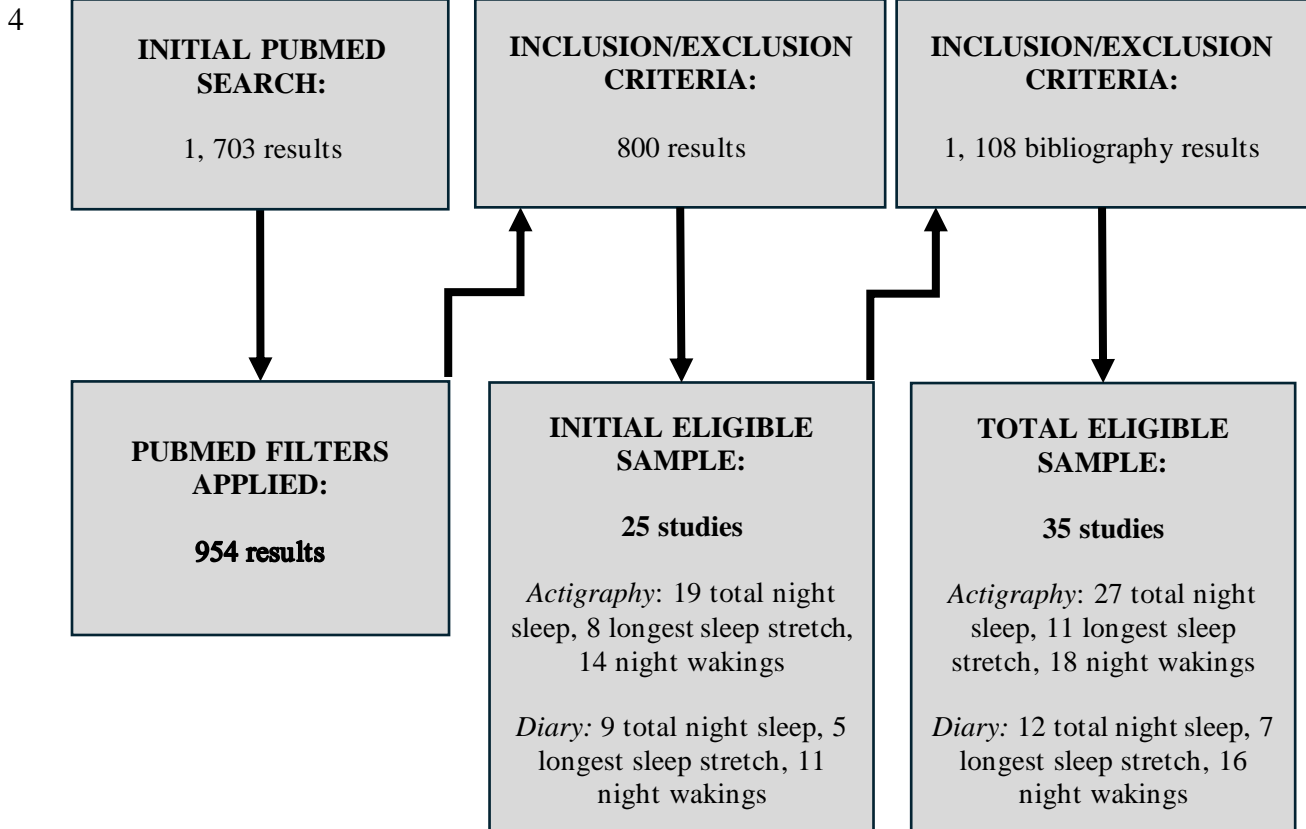

Supplement: Data_Sheet_1.pdf [file Data_Sheet_1.pdf]
